# Supplementary material for: A Research Agenda for Helminth Diseases of Humans: Modelling for Control and Elimination
Source: PubMed Central journal article supplement (PMC3335861; doi:10.1371/journal.pntd.0001548), 2012-04-24

**Figure S1. The Basic and Effective Reproduction Ratios of Helminth Infections (for definitions see Text S2)**

**A.** The effective reproduction ratio ( $R_E$ ) plotted against skin microfilarial load (mf/mg) for the onchocerciasis model of [1], assuming that all adult *Onchocerca volvulus* female worms are mated and incorporating (negative) density dependence of parasite establishment within humans and vectors and parasite-induced vector mortality, for three villages in Cameroon with increasing annual biting rate by *Simulium damnosum*: Tcholliré (ABR=1,000 bites per person per year, blue); Douffing (ABR=2,507, green); Touboro (ABR=8,960, red). Because facilitating density dependence has not been included, the only (non-trivial) equilibrium of the system is locally and globally stable and corresponds to the endemic parasite density, at which  $R_E$  crosses 1 (Tcholliré, predicted = 11, observed = 10 mf/mg; Douffing, predicted = 36, observed = 21 mf/mg; Touboro, predicted = 58, observed = 56 mf/mg). In the absence of an unstable equilibrium, the maximum value of  $R_E$  corresponds to the basic reproduction ratio ( $R_0$ ), reached as microfilarial load tends to zero. For the three villages the estimated values of  $R_0$  are 1.5, 3.8 and 13.2 respectively.

**B.** The effective reproduction ratio ( $R_E$ ) plotted against mean adult worm burden for the model of [2], parameterised for *Ascaris lumbricoides*, taking into account the mating probability (a positive density-dependent process) and density-dependent worm fecundity (a negative density-dependent process) at three levels of severity; blue, 0.01 per worm indicating light constraints on worm fecundity; green, 0.1 per worm, illustrating moderate constraints; red, 0.3, corresponding to stronger constraints. The inclusion of facilitation (mating probability) gives rise to unstable equilibria (transmission breakpoints) to the left-hand side of the maximum (hump)  $R_E$  value (where  $R_E$  crosses 1, represented by dotted lines, respectively, 0.44, 0.06, and 0.03 worms per person for increasing severity of negative

density dependence). The point at which  $R_E$  crosses 1 on the right-hand side is the stable, endemic equilibrium (represented by the black dotted line at 14.5 worms per person). The values of peak  $R_E$  represent the maximum transmission potential of the parasite (since  $R_0$  is density-independent it does not pertain here), and the values are 1.23, 2.61, and 4.14 (blue, green, and red dashed lines).

## References

1. Basáñez MG, Boussinesq M (1999) Population biology of human onchocerciasis. *Phil Trans R Soc Lond B* 354: 809–826.
2. Churcher TS, Filipe JAN, Basáñez MG (2006) Density dependence and the control of helminth parasites. *J Anim Ecol* 75: 1313–1320.

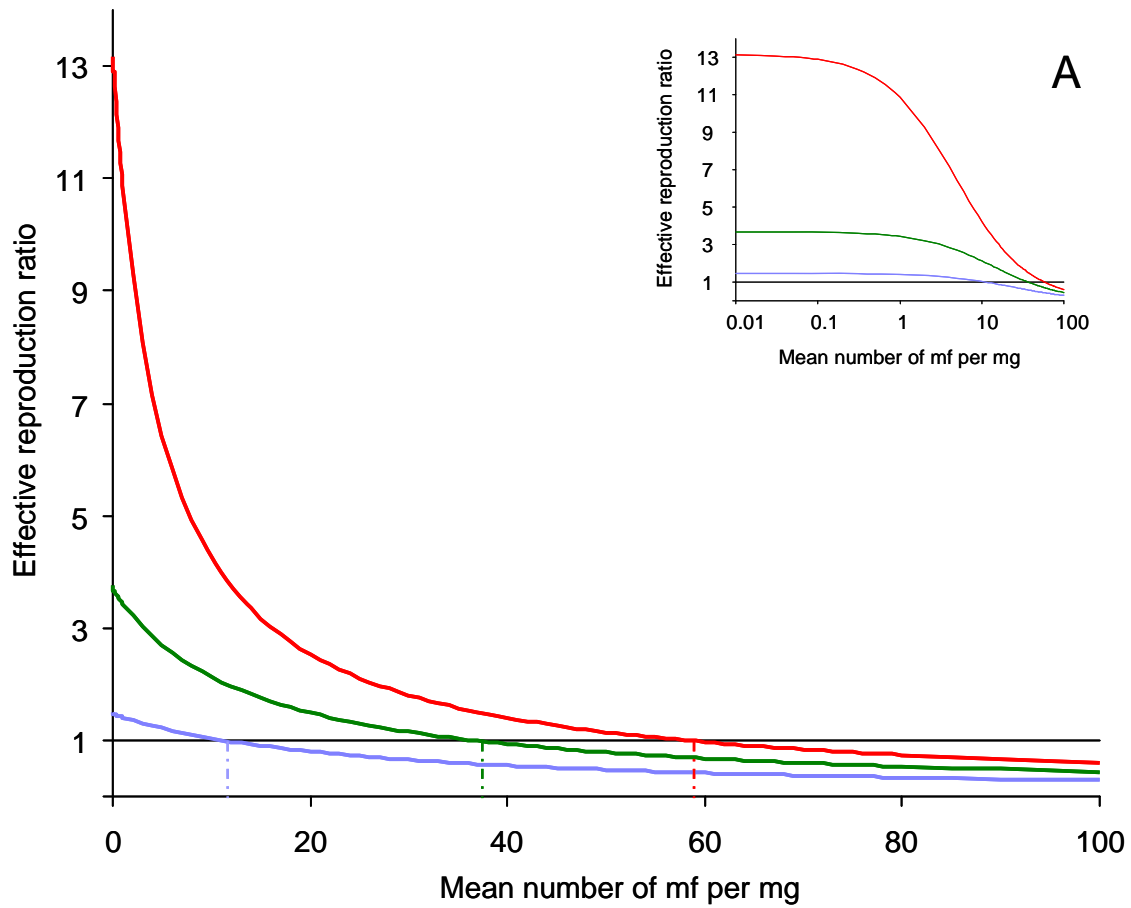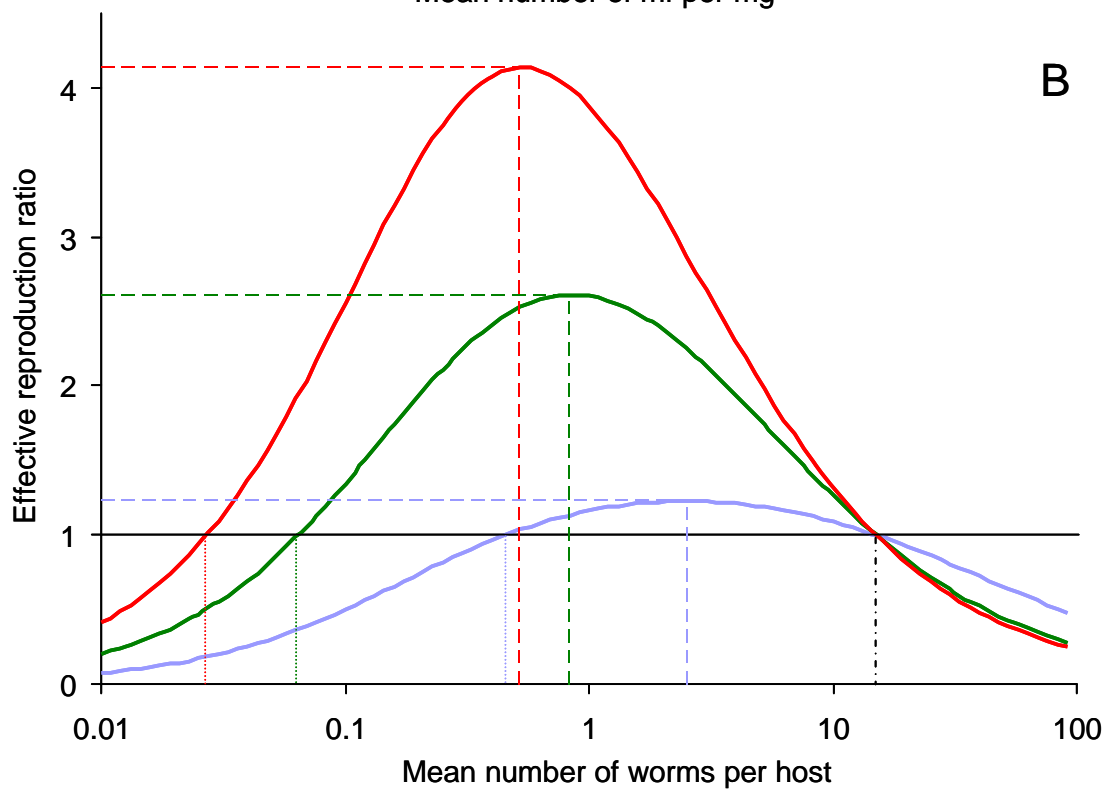

Supplement: pntd.0001548.s001.pdf [file pntd.0001548.s001.pdf]
