# Supplementary material for: A Research Agenda for Helminth Diseases of Humans: Modelling for Control and Elimination
Source: PubMed Central journal article supplement (PMC3335861; doi:10.1371/journal.pntd.0001548), 2012-04-24
Supplement: pntd.0001548.s004.pdf [file pntd.0001548.s004.pdf]

**Table S3. Gap analysis for Mathematical Modelling of Human Helminthiases**

| <b>Core theme</b>                          | <b>What we know</b>                                                                                                                                                   | <b>What research not used / applied</b>                                                                                                                           | <b>What not known</b>                                                                                                                                                                                                                                                            | <b>What research needed</b>                                                                                                                                                                                                                 |
|--------------------------------------------|-----------------------------------------------------------------------------------------------------------------------------------------------------------------------|-------------------------------------------------------------------------------------------------------------------------------------------------------------------|----------------------------------------------------------------------------------------------------------------------------------------------------------------------------------------------------------------------------------------------------------------------------------|---------------------------------------------------------------------------------------------------------------------------------------------------------------------------------------------------------------------------------------------|
| Mathematical models of helminth infections | Behaviour of host-parasite systems at equilibrium                                                                                                                     | Longitudinal studies of the impact of multiple rounds of targeted or MDA on helminth infection and associated morbidity                                           | Anthelmintic efficacy and effectiveness on various parasite life-stages and temporal changes under long-term anthelmintic treatment<br><br>Long-term impact of changes in parasite exposure, load, and mortality on host immune responses and reinfection rates                  | Models fitted to data to estimate efficacy & effectiveness of anthelmintics<br><br>Longitudinal immuno-epidemiological studies<br><br>Models fitted to cohort data to estimate changes in exposure, force of infection, treatment frequency |
|                                            | Parasite and host populations are genetically diverse                                                                                                                 | Host genetics and susceptibility/predisposition to infection<br>Vector genetics and vector competence/capacity<br>Parasite genetics regarding drug susceptibility | Molecular genetic markers of decreased drug efficacy / drug resistance starting to be developed<br><br>Need to distinguish genetic changes in parasite populations from programmatic issues such as low treatment coverage and compliance; reinfection from absence of clearance | Evaluation of temporal trends of treatment coverage & adherence<br>Evaluation of transmission intensity<br><br>Rigorous characterisation of suboptimal responses<br><br>Integration of parasite phenotypic and genotypic studies            |
|                                            | Populations of parasites, intermediate hosts and vectors are not closed entities                                                                                      | Studies on human population movement, flight range of vectors, transportation of snails or parasite larvae                                                        | How human movement and migration patterns affect transmission, infection and disease dynamics and re-introduction in controlled areas                                                                                                                                            | Metapopulation and spatial parasite transmission models                                                                                                                                                                                     |
|                                            | Morbidity control programmes aim at elimination of public health disease burden                                                                                       | Available data on the relationship between infection and morbidity in those programmes following longitudinal cohorts                                             | How disease (as opposed to infection) elimination thresholds relate to burden of disease                                                                                                                                                                                         | Models for disease burden that take into account cumulative effects in addition to present infection status                                                                                                                                 |
|                                            | Allee effects (initial facilitation of transmission at low population densities as parasite load increases) in host-parasite systems lead to transmission breakpoints | The dynamics of transmission breakpoints scarcely studied in helminth infections of humans                                                                        | Relationship between parasite breakpoints and host-parasite interactions<br><br>Relationship between transmission breakpoints and assumed infection thresholds in humans & vectors for elimination                                                                               | Integrate models with data to explore the dynamics of transmission breakpoints for the host-parasite combinations prevailing in endemic areas<br><br>Use modelling to update and refine assumed elimination thresholds                      |
|                                            | Surveillance after cessation of control is important                                                                                                                  | Mathematical models are under-utilised in surveillance systems                                                                                                    | Relationship between model state variables and empirical surveillance tools                                                                                                                                                                                                      | Epidemiological models to aid design of sampling protocols for M&E and surveillance                                                                                                                                                         |
