# Supplementary material for: A Research Agenda for Helminth Diseases of Humans: Modelling for Control and Elimination
Source: PubMed Central journal article supplement (PMC3335861; doi:10.1371/journal.pntd.0001548), 2012-04-24
Supplement: pntd.0001548.s005.pdf [file pntd.0001548.s005.pdf]

### **Text S1. Facilitation and Limitation in Helminth Population Biology**

The concepts of 'facilitation' and 'limitation' were originally used to describe density-dependent processes in the transmission of lymphatic filariases [1], and have been discussed in terms of filariases eradicability [2]. More generally, a parasite population process is density dependent when the rate at which the process occurs increases (positive density dependence, facilitation) or decreases (negative density dependence, limitation) with increasing parasite density.

#### **Examples of positive (facilitating) density dependence:**

- i) the probability of a female worm being mated (for non-hermaphroditic parasites) within the definitive host [3], which initially increases with parasite density as there is a greater chance of worms of different sexes finding each other and mating
- ii) the probability of an ingested microfilaria establishing within (anopheline and simuliid) vectors (of lymphatic filariasis and onchocerciasis) with cibarial armatures, as there is a greater chance that some microfilariae escape damage by the armature as microfilarial density increases [4]
- iii) the rate of establishment of incoming parasites being facilitated (e.g. onchocerciasis [5]) by already established parasites (via immunosuppression)

#### **Examples of negative (constraining) density dependence:**

- i) the limitation of microfilarial establishment and/or infective (L3) larval development within vectors of filarial nematodes as microfilarial density increases [4]
- ii) the reduction in per female worm rate of egg production with increasing adult worm density [6]
- iii) the reduced establishment rate of incoming worms (e.g. schistosomiasis [7]) due to established worms (via concomitant immunity)
- iv) the higher mortality rate experienced by heavily infected (definitive, intermediate, or vector) hosts [4]

#### **References**

1. Pichon G, Perrault G, Laigret J (1974) Rendement parasitaire chez les vecteurs de filarioses. Bull World Health Organ 51: 517–524.
2. Duerr HP, Dietz K, Eichner M (2005) Determinants of the eradicability of filarial infections: a conceptual approach. Trends Parasitol 21: 88–96.
3. May RM (1977) Togetherness among schistosomes: its effects on the dynamics of the infection. Math Biosci 35: 301–343.
4. Basáñez MG, Churcher TS, Grillet ME (2009) *Onchocerca-Simulium* interactions and the population and evolutionary biology of *Onchocerca volvulus*. Adv Parasitol 68: 263–313.
5. Duerr HP, Dietz K, Schulz-Key H, Büttner DW, Eichner M (2003). Density-dependent parasite establishment suggests infection-associated immunosuppression as an important mechanism for parasite density regulation in onchocerciasis. Trans R Soc Trop Med Hyg 97: 242–250.
6. Walker M, Hall A, Anderson RM, Basáñez MG (2009) Density-dependent constraints on the weight of female *Ascaris lumbricoides* infections of humans and its impact on patterns of egg production. Parasit Vectors 2: 11.
7. Chan MS, Guyatt HL, Bundy DAP, Booth M, Fulford AJC, Medley GF (1995) The development of an age structured model for schistosomiasis transmission dynamics and control and its validation for *Schistosoma mansoni*. Epidemiol Infect 115: 325–344.
