# Supplementary material for: A Research Agenda for Helminth Diseases of Humans: Modelling for Control and Elimination
Source: PLoS Negl Trop Dis. 2012 Apr 24;6(4):e1548. doi: 10.1371/journal.pntd.0001548 (PMC3335861; doi:10.1371/journal.pntd.0001548)
Supplement: Table S2 — Gap Analysis for Helminth Epidemiology (PDF) [file pntd.0001548.s003.pdf]

**Table S2. Gap analysis for Helminth Epidemiology and Population Biology**

| Core theme                                   | What we know                                                                                                                                                                          | What research not used / applied                                                                                                        | What not known                                                                                                                                                                | What research needed                                                                                                                                                                            |
|----------------------------------------------|---------------------------------------------------------------------------------------------------------------------------------------------------------------------------------------|-----------------------------------------------------------------------------------------------------------------------------------------|-------------------------------------------------------------------------------------------------------------------------------------------------------------------------------|-------------------------------------------------------------------------------------------------------------------------------------------------------------------------------------------------|
| Helminth epidemiology and population biology | Some parasitic helminths may have long life-spans. Life expectancy is an average duration of life, not a maximum longevity                                                            | More accurate knowledge of parasite life-span may guide minimum duration of interventions, reducing false expectations                  | Mean, variance, and distribution of parasite survival times (both adult worms and transmission stages)                                                                        | Literature review and data gathering<br><br>Mathematical modelling and sensitivity / uncertainty analysis                                                                                       |
|                                              | Parasite populations are stable, resilient, and regulated by density-dependent mechanisms                                                                                             | Influence of nonlinear processes on the outcome of interventions is often underestimated                                                | Functional form, magnitude, relative contribution, and where in the parasite's life-cycle density-dependent mechanisms operate                                                | Experimental studies where possible (e.g. vector feeding experiments in the filarial infections)<br><br>Fitting models to data and testing of hypotheses                                        |
|                                              | Prevalence-Intensity relationships are strongly nonlinear and determined by underlying distribution of parasites per host                                                             | Influence of overdispersed distributions is often underestimated because of focus on mean parasite load                                 | Changes in parasite distribution among host populations resulting from intervention                                                                                           | Awareness of parasite distribution variance and its effects on uncertainty about infection prevalence and intensity<br><br>Collecting data on parasite freq. distribution as control progresses |
|                                              | Age-infection profiles reflect processes of parasite acquisition-loss, and may be influenced by age-specific changes in exposure and development of immunity                          | Age-specific changes in the force of infection (FOI) not well quantified for helminth infections                                        | Disentangling age from cumulative exposure effects; relative roles of exposure and immunity; immune response type, against which parasite life-stages, magnitude and duration | Quantification of FOI in sentinel (and cohort) groups as control progresses<br><br>Effect of co-infection interactions on age profiles of infection and morbidity                               |
|                                              | Detection of transmission stages as indirect measures for parasitological diagnosis<br><br>Methods to quantify parasite presence/abundance are inaccurate and results highly variable | Bayesian statistical methods in the absence of a gold standard infrequently used                                                        | Changes in diagnostic sensitivity as control progresses                                                                                                                       | Tools to detect parasite exposure, viability, reproductive activity in advanced stages of control / elimination<br><br>Assessment of infectivity to filarial vectors (xenodiagnosis)            |
|                                              | Exposure to parasite infection, and contamination of the environment by hosts can often vary significantly with host age (e.g. schistosomiasis)                                       | Knowledge of infection patterns in young children will help to estimate FOI and reductions in environmental transmission with treatment | Patterns of parasite exposure and contamination in very young children (<5yrs)                                                                                                | Inclusion of these host sub-populations in cohort studies in M&E programmes                                                                                                                     |
|                                              |                                                                                                                                                                                       |                                                                                                                                         |                                                                                                                                                                               |                                                                                                                                                                                                 |

**Table S2. Gap analysis for Helminth Epidemiology and Population Biology (Continued)**

| <b>Core theme</b>                            | <b>What we know</b>                                                                                                                                      | <b>What research not used / applied</b>                                                                                                                                      | <b>What not known</b>                                                                                                                                                                                                           | <b>What research needed</b>                                                                                                                                                                                                                                               |
|----------------------------------------------|----------------------------------------------------------------------------------------------------------------------------------------------------------|------------------------------------------------------------------------------------------------------------------------------------------------------------------------------|---------------------------------------------------------------------------------------------------------------------------------------------------------------------------------------------------------------------------------|---------------------------------------------------------------------------------------------------------------------------------------------------------------------------------------------------------------------------------------------------------------------------|
| Helminth epidemiology and population biology | Laboratory-based estimates of parasite kill rates (for some helminth species)                                                                            | Longitudinal studies of multiple rounds of targeted or MDA                                                                                                                   | Effectiveness of drug interventions in different field settings                                                                                                                                                                 | Computational inference of drug effectiveness using available data                                                                                                                                                                                                        |
|                                              | <p>Morbidity associated with helminth parasites is assumed to be a function of infection intensity</p> <p>Multiparasitism may influence co-morbidity</p> | <p>Longitudinal studies of changes in morbidity and co-morbidity as a result of targeted or MDA</p> <p>Studies focusing on co-infections and co-morbidities are starting</p> | <p>Functional relationships between parasite load and associated disease not well characterised</p> <p>Are the WHO guidelines for treatment regularity been rigorously investigated given updated information on morbidity?</p> | <p>Statistical and mathematical methods and models for the quantitative study of parasite-induced morbidity and mortality and their temporal dynamics</p> <p>Evaluation, in light of updated data, of categories to classify high, medium and low infection intensity</p> |
